# Supplementary material for: Dentinal Tubule Penetrability and Bond Strength of Two Novel Calcium Silicate-Based Root Canal Sealers
Source: MDPI journal article supplement (doi:10.3390/ma16093309), 2023-04-23
Supplement: s1 [file s1]

## Supplementary Tables

**Table S1—supplementary.** Means and standard deviations of penetrability (%) as a function of sealer and root third and their main effects

| Sealer                    | Root Third – Mean (SD) |               |               |                 |
|---------------------------|------------------------|---------------|---------------|-----------------|
|                           | Coronal                | Middle        | Apical        | Marginal Means  |
| AH Plus                   | 8.35 (5.42)            | 7.94 (5.47)   | 5.70 (2.65)   | 7.31 (4.65) a,b |
| EndoSequence              | 53.60 (15.00)          | 53.33 (26.41) | 37.95 (24.52) | 50.34 (22.48) a |
| AH Plus Bioceramic Sealer | 32.74 (14.26)          | 41.34 (26.85) | 45.89 (27.37) | 39.99 (23.36) b |
| Marginal Means            | 33.42 (22.05)          | 34.87 (29.26) | 29.84 (27.32) |                 |

\*Same lowercase letters denote significant differences between root canal sealers ( $p < 0.05$  by post-hoc Tukey's test ( $n=10$ )).

**Table S2—supplementary.** Means and standard deviations of bond strength [14] as a function of sealer and root third and their main effects

| Sealer                    | Root Third – Mean (SD) |               |               |                 |
|---------------------------|------------------------|---------------|---------------|-----------------|
|                           | Coronal                | Middle        | Apical        | Marginal Means  |
| AH Plus                   | 2.17 (0.05)            | 3.09 (0.31)   | 4.52 (0.47)   | 3.26 (1.06) a,b |
| EndoSequence              | 1.77 (0.24)            | 2.30 (0.57)   | 3.08 (0.77)   | 2.38 (0.75) a   |
| AH Plus Bioceramic Sealer | 1.71 (0.10)            | 1.91 (0.17)   | 2.88 (0.93)   | 2.16 (0.72) b   |
| Marginal Means            | 1.88 (0.25) A,B        | 2.44 (0.62) B | 3.49 (1.01) A |                 |

\*Same lowercase letters denote significant differences between root canal sealers ( $p < 0.05$  by post-hoc Tukey's test ( $n=10$ )).

\*Same uppercase letters denote significant differences between root thirds ( $p < 0.05$  by post-hoc Tukey tests ( $n=30$ )).
